# Supplementary material
Source: PubMed Central journal article supplement (PMC2700334)
Supplement: halms368414-supplement_1.pdf [file halms368414-supplement_1.pdf]

| <b>Characteristic</b>             | <b>TG<br/>n=48</b> | <b>VG<br/>n=120</b> | <b>Arkansas<br/>n=345</b> |
|-----------------------------------|--------------------|---------------------|---------------------------|
| Age                               | 58,5 [37-72]       | 56 [35-73]          | 57 [25-77]                |
| Monoclonal protein                |                    |                     |                           |
| IgG                               | 25                 | 69                  | 193                       |
| IgA                               | 11                 | 29                  | 93                        |
| Bence Jones                       | 10                 | 19                  | 47                        |
| Asecretory                        | 2                  | 2                   | 6                         |
| IgD                               | 0                  | 1                   | 3                         |
| NA                                | 0                  | 0                   | 3                         |
| Myeloma in Durie and Salmon stage |                    |                     |                           |
| I                                 | 4                  | 9                   | NA                        |
| II                                | 5                  | 22                  | NA                        |
| III                               | 39                 | 89                  | NA                        |
| Myeloma in ISS stage              |                    |                     |                           |
| I                                 | 15                 | 55                  | 189                       |
| II                                | 26                 | 39                  | 86                        |
| III                               | 7                  | 23                  | 70                        |
| NA                                | 0                  | 3                   | 0                         |
| Serum $\beta$ 2-microglobulin     | 3.55 [1.3-11.9]    | 3.1 [1.5-53.6]      | 2.9 [1.0-38.7]            |
| Plasma cells in bone marrow       | 45 [5-100]         | 40 [1-100]          | 42 [4-98]                 |
