# Supplementary material
Source: PubMed Central journal article supplement (PMC2700334)
Supplement: halms368414-supplement_2.pdf [file halms368414-supplement_2.pdf]

| Analysis                    | Details           |                |     |               |               |                | n          |      |            |
|-----------------------------|-------------------|----------------|-----|---------------|---------------|----------------|------------|------|------------|
| GEP                         | MMC               | HM-group       | TG  | U133A+B       |               |                | 65         |      |            |
|                             |                   |                | VG  | U133 Plus 2.0 |               |                | 168        |      |            |
|                             |                   |                |     |               |               |                | <b>233</b> |      |            |
|                             |                   | Arkansas-group |     | U133 Plus 2.0 |               |                | <b>345</b> |      |            |
|                             | other populations |                |     | TG            | U133A+B       | MBC            | 7          |      |            |
|                             |                   |                |     |               |               | PPC            | 7          |      |            |
|                             |                   |                |     |               |               | BMPC           | 7          |      |            |
|                             |                   |                |     |               |               | MGUS           | 7          |      |            |
|                             |                   |                |     |               |               | HMCL           | 20         |      |            |
|                             |                   |                |     |               |               |                | <b>48</b>  |      |            |
|                             |                   | HM-group       |     | VG            | U133 Plus 2.0 | MBC            | 6          |      |            |
|                             |                   |                |     |               |               | PPC            | 5          |      |            |
|                             |                   |                |     |               |               | BMPC           | 7          |      |            |
|                             |                   |                |     |               |               | MGUS           | 5          |      |            |
|                             | HMCL              |                |     |               |               | 20             |            |      |            |
|                             | Testis            |                |     |               |               | 5              |            |      |            |
|                             | CD3               |                |     |               |               | 5              |            |      |            |
|                             | CD14              |                |     |               |               | 5              |            |      |            |
|                             | CD15              |                |     |               |               | 5              |            |      |            |
|                             | CD34              |                |     |               |               | 5              |            |      |            |
| OC                          | 7                 |                |     |               |               |                |            |      |            |
|                             |                   |                |     |               | <b>75</b>     |                |            |      |            |
|                             |                   |                | WBM | U133 Plus 2.0 | WBM-ND        | 7              |            |      |            |
|                             |                   |                |     |               | WBM-MM        | 57             |            |      |            |
|                             |                   |                |     |               |               | <b>64</b>      |            |      |            |
|                             |                   |                | MSC | U133 Plus 2.0 | MSC-ND        | 7              |            |      |            |
|                             |                   |                |     |               | MSC-MGUS      | 5              |            |      |            |
|                             |                   |                |     |               | MSC-MM        | 7              |            |      |            |
|                             |                   |                |     |               | <b>19</b>     |                |            |      |            |
|                             |                   |                |     |               | <b>784</b>    |                |            |      |            |
| Survival (HDT)              | MMC               | HM-group       | TG  |               |               |                | 48         |      |            |
|                             |                   |                | VG  |               |               |                | 120        |      |            |
|                             |                   | Arkansas-group |     |               |               |                | 345        |      |            |
|                             |                   |                |     |               |               | <b>513</b>     |            |      |            |
| PI                          | MMC               | HM-group       | VG  |               |               |                | <b>66</b>  |      |            |
| iFISH                       | MMC               | HM-group       |     |               | TG            | VG             | subclonal  |      |            |
|                             |                   |                |     |               | t(4;14)       | 65             | 100        | 142  | <b>165</b> |
|                             |                   |                |     |               | t(11;14)      | 65             | 102        | 142  | <b>167</b> |
|                             |                   |                |     |               | 11q13         | 56             | 102        | 123  | <b>158</b> |
|                             |                   |                |     |               | 1q21          | 53             | 96         | 127  | <b>149</b> |
|                             |                   |                |     |               | 17p13         | 58             | 101        | 118  | <b>159</b> |
|                             |                   |                |     |               | 13q14         | 65             | 104        | 109  | <b>169</b> |
|                             |                   |                |     |               | 11q23         | 64             | 104        | 125  | <b>168</b> |
|                             |                   |                |     |               | 9q34          | 17             | 52         | 67   | <b>69</b>  |
|                             |                   |                |     |               | 15q22         | 46             | 56         | 78   | <b>102</b> |
|                             |                   |                |     |               | 19q13         | 46             | 70         | 85   | <b>116</b> |
|                             |                   |                |     |               | 4p16          | 12             | 82         | 93   | <b>94</b>  |
|                             |                   |                |     |               | 8p21          | 50             | 68         | 92   | <b>118</b> |
|                             |                   |                |     |               | 14q32         | 28             | 95         | 104  | <b>123</b> |
|                             |                   |                |     |               | 22q11         | 45             | 46         | 64   | <b>93</b>  |
|                             |                   |                |     |               |               | Arkansas-group |            | 1q21 |            |
|                             |                   |                | any |               |               | <b>344</b>     |            |      |            |
| Inhibition of proliferation | HMCL              | HM-group       |     |               |               |                | <b>20</b>  |      |            |
| Western blotting; qRT-PCR   | HMCL              | HM-group       |     |               |               |                | <b>10</b>  |      |            |
| Primary MMC                 | MMC               | HM-group       |     |               |               |                | <b>5</b>   |      |            |
