# Supplementary material
Source: PubMed Central journal article supplement (PMC2700334)
Supplement: halms368414-supplement_3.pdf [file halms368414-supplement_3.pdf]

A

| Gene Symbol | Probeset    | Exprs. BMPC | $\Delta$ MBC | $\Delta$ PPC | $\Delta$ MGUS | $\Delta$ MM | $\Delta$ HMCL | p-value BM | p-value PPC | p-value MGUS | p-value MM | p-value HMCL |
|-------------|-------------|-------------|--------------|--------------|---------------|-------------|---------------|------------|-------------|--------------|------------|--------------|
| AURKA       | 208079_s_at | 3.53        | 0.04         | 6.34         | -0.08         | 0.55        | 6.25          | 0.93       | <0.001      | 0.92         | 0.19       | <0.001       |
| AURKB       | 209464_at   | 3.22        | -0.17        | 4.76         | -0.09         | -0.08       | 4.05          | 0.8        | <0.001      | 0.91         | 0.91       | <0.001       |

| Gene Symbol | Probeset    | Exprs. MBC | $\Delta$ BMPC | $\Delta$ PPC | $\Delta$ MGUS | $\Delta$ MM | $\Delta$ HMCL | p-value BMPC | p-value PPC | p-value MGUS | p-value MM | p-value HMCL |
|-------------|-------------|------------|---------------|--------------|---------------|-------------|---------------|--------------|-------------|--------------|------------|--------------|
| AURKA       | 208079_s_at | 3.56       | -0.04         | 6.31         | -0.12         | 0.51        | 6.21          | 0.93         | <0.001      | 0.9          | 0.24       | <0.001       |
| AURKB       | 209464_at   | 3.05       | 0.17          | 4.93         | 0.08          | 0.09        | 4.22          | 0.8          | <0.001      | 0.9          | 0.89       | <0.001       |

| Gene Symbol | Probeset    | Exprs. MGUS+MMI | $\Delta$ MMII+MMIII | p-value MMII+MMIII |
|-------------|-------------|-----------------|---------------------|--------------------|
| AURKA       | 208079_s_at | 3.49            | 0.68                | 0.014              |

B

| Gene Symbol | Probeset    | Exprs. BMPC | $\Delta$ MBC | $\Delta$ PPC | $\Delta$ MGUS | $\Delta$ MM | $\Delta$ HMCL | p-value BM | p-value PPC | p-value MGUS | p-value MM | p-value HMCL |
|-------------|-------------|-------------|--------------|--------------|---------------|-------------|---------------|------------|-------------|--------------|------------|--------------|
| AURKA       | 208079_s_at | 3.45        | -0.28        | 6.81         | 0.09          | 0.86        | 6.87          | 0.83       | <0.001      | 0.92         | 0.1        | <0.001       |
| AURKB       | 209464_at   | 3.28        | -0.37        | 3.96         | 0.1           | 0.17        | 3.49          | 0.39       | <0.001      | 0.88         | 0.63       | <0.001       |

| Gene Symbol | Probeset    | Exprs. MBC | $\Delta$ BMPC | $\Delta$ PPC | $\Delta$ MGUS | $\Delta$ MM | $\Delta$ HMCL | p-value BM | p-value PPC | p-value MGUS | p-value MM | p-value HMCL |
|-------------|-------------|------------|---------------|--------------|---------------|-------------|---------------|------------|-------------|--------------|------------|--------------|
| AURKA       | 208079_s_at | 3.17       | 0.28          | 7.09         | 0.37          | 1.14        | 7.15          | 0.66       | <0.001      | 0.64         | 0.04       | <0.001       |
| AURKB       | 209464_at   | 2.91       | 0.37          | 4.33         | 0.47          | 0.53        | 3.86          | 0.32       | <0.001      | 0.25         | 0.04       | <0.001       |

| Gene Symbol | Probeset    | Exprs. MGUS+MMI | $\Delta$ MMII+MMIII | p-value MMII+MMIII |
|-------------|-------------|-----------------|---------------------|--------------------|
| AURKA       | 208079_s_at | 3.74            | 0.68                | 0.012              |
