# Supplementary material
Source: PubMed Central journal article supplement (PMC2700334)

A

## EFS HM-group

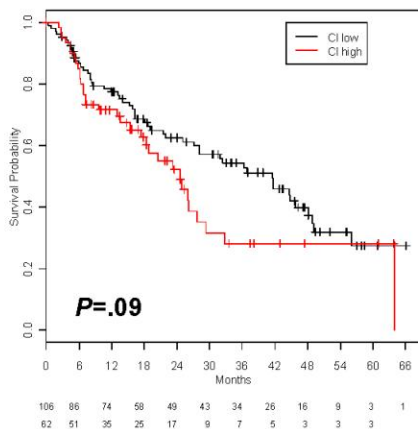

## EFS Arkansas-group

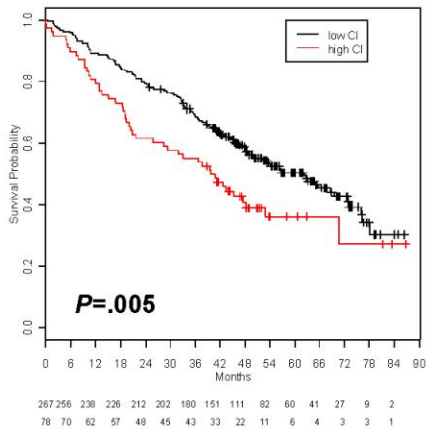

B

## OAS HM-group

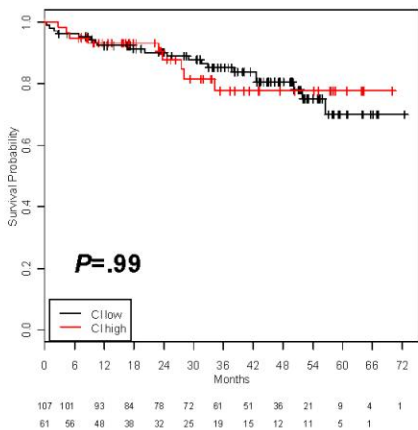

## OAS Arkansas-group

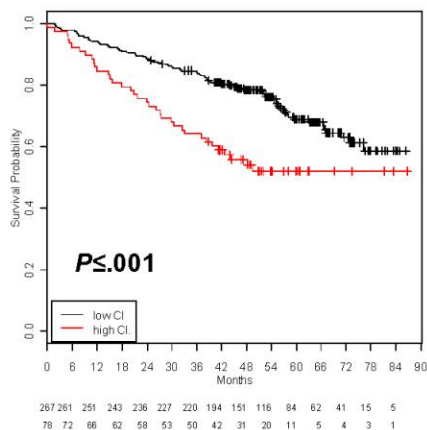

Supplement: halms368414-supplement_4.pdf [file halms368414-supplement_4.pdf]
